1 **SMALL MOLECULE CLPP AGONISTS INDUCE SENESENCE AND ALTER TRAIL-**  
2 **MEDIATED APOPTOTIC RESPONSE OF TRIPLE-NEGATIVE BREAST CANCER**  
3 **CELLS**

4  
5 Lucas J. Aponte-Collazo<sup>1</sup>, Emily M. J. Fennell<sup>1</sup>, Michael P. East<sup>1</sup>, Thomas S. K. Gilbert<sup>1</sup>, Paul R.  
6 Graves<sup>2</sup>, Hani Ashamalla<sup>2</sup>, Edwin J. Iwanowicz<sup>3</sup>, Yoshimi Endo Greer<sup>4</sup>, Stanley Lipkowitz<sup>4</sup>, and  
7 Lee M. Graves<sup>1</sup>

8  
9 <sup>1</sup>Department of Pharmacology and the Lineberger Comprehensive Cancer Center, University of North Carolina at Chapel Hill,  
10 Chapel Hill, North Carolina 27599, United States

11 <sup>2</sup>Department of Radiation Oncology, New York Presbyterian Brooklyn Methodist Hospital, Brooklyn, New York 11215, United  
12 States

13 <sup>3</sup>Madera Therapeutics LLC, Chapel Hill, North Carolina, United States

14 <sup>4</sup>Women's Malignancies Branch, Center for Cancer Research, National Cancer Institute, National Institutes of Health, Bethesda,  
15 Maryland, United States

16  
17 **Corresponding author:** Lee M. Graves, Department of Pharmacology, University of North  
18 Carolina, Chapel Hill, NC 27599. E-mail: [img@med.unc.edu](mailto:img@med.unc.edu)

19  
20 **Keywords:**

21 ClpP, TR compounds, TRAIL, ONC201, Senescence, Mitochondria

22  
23 **HIGHLIGHTS**

- 24 • **Treatment of TNBC cells with ClpP activators induces senescence in vitro**  
25 • **Induction of senescence is ClpP dependent**  
26 • **Activation of ClpP leads to changes in mRNA levels of senescence associated cytokines**  
27 • **Senescent TNBC cells are sensitized to TRAIL mediated apoptosis**

28  
29 **Abstract**

30  
31 Imipridones are a novel class of anticancer drugs with promising antiproliferative effects in  
32 several cancer cell types, including breast cancer. Recent studies identified the mitochondrial  
33 ATP-dependent caseinolytic peptidase P (ClpP) as the target for imipridones and related analogs.  
34 Despite these findings, the specific processes by which ClpP activators inhibit cancer cell growth  
35 remain poorly understood. Here we report that two structurally distinct ClpP activators, ONC201  
36 and TR-57, promote senescence in SUM159 and MDA-MB-231 triple-negative breast cancer  
37 (TNBC) cell lines. Induction of senescence was measured through  $\beta$ -galactosidase assays and  
38 confirmed by the increase of H2A.X phosphorylation, hypophosphorylation of retinoblastoma  
39 protein (Rb), upregulation of multiple interleukin mRNAs and other markers. The level of

40 senescence induced by these compounds was equivalent to that observed with the CDK4/6  
41 inhibitor and positive control abemaciclib. To confirm the crucial role of ClpP activation in  
42 senescence induction, we generated ClpP null TNBC cell lines using CRISPR interference (CRISPRi).  
43 Neither ONC201 nor TR-57 induced senescence in the ClpP null models. Incubation of WT cells  
44 with ClpP activators led to a reduction in the levels of apoptosis-related proteins like XIAP,  
45 SMAC/DIABLO, Survivin, DR4 and DR5, which correlated with the lack of apoptosis observed in  
46 these cells. Interestingly, treatment with TR-57 strongly reduced apoptosis induced by  
47 staurosporine but increased sensitivity to tumor necrosis factor-related apoptosis-inducing  
48 ligand (TRAIL). To investigate the enhanced effects of TRAIL, we examined the expression of  
49 Wee1 in senescent cells and found that both TR-57 and abemaciclib down-regulated Wee1.  
50 Addition of a Wee1 inhibitor partially sensitized cells to TRAIL suggesting the importance of Wee1  
51 in this process. In summary, we show that ClpP activators induce senescence in a ClpP-dependent  
52 manner and that combined treatment of ClpP activators with TRAIL provides an effective  
53 approach to eliminate malignant senescent cells *in vitro*.

54

## 55 **Introduction**

56

57 Triple-negative breast cancer (TNBC) is the most aggressive subtype of breast cancer with a  
58 significantly lower survival rate than other subtypes<sup>1</sup>. Since TNBC cells lack estrogen and  
59 progesterone hormone receptors or enrichment of the receptor tyrosine kinase HER2, targeted  
60 therapeutics like tamoxifen and trastuzumab are largely ineffective. Current treatments for TNBC  
61 patients are limited to surgical intervention and traditional chemotherapies accompanied by  
62 immunotherapies<sup>2,3</sup>. ONC201 is a recently discovered imipridone molecule in Phase I/II clinical  
63 trials for a large variety of aggressive cancers including breast, glioblastoma, and endometrial  
64 among others<sup>4,5</sup>. Since its discovery, multiple ONC201 analogs have been synthesized including  
65 ONC206, ONC212 and the highly potent TR compounds<sup>6-10</sup>. While ONC212 has shown promising  
66 broad-spectrum activity across multiple tumor types *in vitro*, studies to facilitate approval of first-  
67 in-human clinical trials are currently ongoing. Recently, ONC206 entered clinical trials for the  
68 treatment of central nervous system cancers<sup>11</sup>.

69

70 Although ONC201 was initially proposed to promote apoptosis through increased TRAIL  
71 formation and signaling<sup>12</sup>, its growth inhibitory effects were shown even in the absence of TRAIL  
72 in breast cancer cell lines<sup>13</sup>. The direct target for ONC201 and related compounds was unknown

73 until our lab and others demonstrated that they bound and activated the mitochondrial ATP-  
74 dependent Clp protease (ClpP), the catalytic subunit of the ClpXP complex<sup>9,14</sup>. ClpP proteolytical  
75 activity is regulated by ClpX in an ATP-dependent manner. Ishizawa et al. demonstrated that  
76 ONC201 displaced ClpX and converted the ClpP subunit to an open and active conformation. In  
77 addition to its well-established role in mitochondrial protein degradation, ClpP activation has  
78 been linked to regulation of cell growth and apoptosis through signaling events like the unfolded  
79 protein response and the integrated stress response<sup>9,13,15–19</sup>. Studies from our lab and others  
80 showed that while ClpP activators reduced TNBC cell proliferation, they did not significantly  
81 induce apoptosis *in vitro*<sup>9,13</sup>. Since growth arrest and lack of apoptosis are typically observed in  
82 senescent cells<sup>20,21</sup>, we investigated whether ClpP activators were inducing senescence in TNBC  
83 models.

84  
85 Cellular senescence is characterized by a lack of cell cycle progression, increased levels of  $\beta$ -  
86 galactosidase ( $\beta$ -gal), increased levels of DNA damage, high levels of cyclin-dependent kinase  
87 inhibitor p16INK4a, elevated expression of anti-apoptotic proteins, and apoptosis resistance  
88 among others markers<sup>22–24</sup>. Additionally, senescent cells display activation of senescence-  
89 associated secretory phenotype (SASP) which is believed to enhance innate and adaptive  
90 immune cell recruitment by secretion of specific cytokines and chemokines<sup>25,26</sup>. Cell senescence  
91 *in vitro* can also be induced by mitochondrial dysfunction. Mitochondrial dysfunction-associated  
92 senescence (MiDAS) shares many similarities with other types of senescence but has a different  
93 SASP profile than other types of senescence<sup>27,28</sup>.

94  
95 Induction of senescence as an alternative strategy to reduce tumor growth, has been the focus  
96 of multiple studies<sup>29,30</sup>. This has led to the approval of senescence-inducing drugs, like palbociclib  
97 and other CDK4/6 inhibitors, as a combinatorial treatment for specific cancer types including  
98 TNBC<sup>31</sup>. While therapy-induced senescence was initially thought to be an effective standalone  
99 treatment to inhibit cancer cell growth, further research has shown that chronic presence of  
100 senescent cells can be detrimental to tumor reduction since it promotes inflammation and  
101 modulates metastasis of nearby non-senescent cells<sup>32</sup>. Thus, these studies highlight the need to

102 better understand the mechanisms promoting senescent cell clearance after therapy-induced  
103 senescence.

104

105 In this study we show that a recently identified ClpP activator, TR-57, induces senescence in a  
106 ClpP-dependent manner. We also demonstrate that TR-57 generates a moderate SASP profile  
107 and activates AMPK and other senescence-associated events similar to MiDAS. Lastly, we  
108 demonstrate that ClpP-activated senescent cells have lower levels of key apoptosis-related  
109 proteins and reduced apoptosis, but show increased TRAIL-mediated apoptosis. These results  
110 suggest that combining ClpP activators with TRAIL agonists may be an effective treatment  
111 approach for TNBC.

112

## 113 **Materials and Methods**

114

### 115 Chemicals

116 ONC201 was obtained from SelleckChem. The TR-57 and TR-107 compounds were supplied by  
117 Madera Therapeutics, LLC. abemaciclib was obtained from advanced Chemblock inc. TRAIL (Cat.  
118 No. HY-P7306) and Adavosertib (Cat. No. HY-10993) were obtained from MedChemExpress.

119

### 120 Cell Culture

121 Human TNBC cell line SUM159 were a generous gift from Dr. Gary Johnson at UNC CH. MDA-MB-  
122 231 were a generous gift from Yoshimi Greer at NCI. SUM159 cells were cultured in Dulbecco's  
123 modified Eagle's medium: Nutrient Mixture F-12 supplemented with 5% fetal bovine serum 5  
124  $\mu\text{g}/\text{mL}$  insulin, 1  $\mu\text{g}/\text{mL}$  hydrocortisone, and 1% mixture of antibiotic-antimycotic. MDA-MB-231  
125 cells were cultured in RPMI 1640 media supplemented with 10% FBS and 1%  
126 antibiotic-antimycotic.

127

### 128 Senescence-associated $\beta$ -galactosidase staining

129 SUM159 and MDA-MB-231 cells were stained for SA- $\beta$ -gal detection using a Senescence  $\beta$ -  
130 galactosidase Staining Kit (#9860, Cell Signaling). Staining was performed by following the

131 manufacturer's instructions and incubating the stained samples for 48hrs at 37°C without CO<sub>2</sub>.  
132 Images for SA-β-gal quantifications were acquired using a ZEISS Axio Vert.A1 inverted microscope  
133 at 10x magnification. For each biological replicate, an area of the well was randomly selected,  
134 and the total of SA-β-gal positive cells were manually counted. Quantification and further analysis  
135 of the data was performed using Fiji software (ImageJ).

136

### 137 Viability assays

#### 138 *MTS*

139 Cell viability assays were performed by plating SUM159 WT or SUM159 ClpP null cells (1000  
140 cells/well) on a 96-well plate (655-180, Greiner) in their respective media as indicated previously.  
141 Cells were allowed to adhere overnight. After adherence, the media in each well was aspirated  
142 and replaced with 100 μL of media containing the indicated compound(s). Cells treated with  
143 DMSO (vehicle) were used as a negative control in all experiments. Cells treated with the  
144 indicated concentrations of selected compounds for 72 h in 100 μL of incubation media were  
145 supplemented with 20 μL of 0.6 mM resazurin (Acros Organics 62758-13-8) and incubated for 30  
146 min at 37°C. 75 μL of each sample was then transferred to a black 96-well plate (CLS3915,  
147 Millipore Sigma), and the relative fluorescence of resorufin across samples was determined using  
148 a PHERAstar plate reader (BMG Labtech) with fluorescent module FI: 540-20, 590-20. The results  
149 were analyzed using GraphPad Prism 9 software.

150

#### 151 *Total Cell count*

152 Total cell counting assays were performed by plating and treating cells as described above. At the  
153 predetermined time points (0, 24, 48, or 72 h), media was aspirated, and 100 μL of Hoechst stain  
154 (1 μg/mL, H3570, Thermo Fisher Scientific) was added to each well and allowed to incubate for  
155 15 min at 37°C. Total cell number was then quantified using the Celigo Imaging Cytometer  
156 (Nexcelom).

157

158

159

## 160 Immunoblotting

161 Cells were plated in a 6 well plate (100,000 cells/well) or 10 cm dishes (1,000,000 cells/plate) and  
162 treated with compounds as described above. Following treatment, cells were lysed with RIPA  
163 buffer [no SDS, 2 mM Na(VO<sub>3</sub>)<sub>4</sub>, 10 mM NaF, 0.0125 μM calyculin A, and complete protease  
164 inhibitor cocktail (11873580001, Roche Diagnostics)] and lysates immunoblotted as described  
165 previously<sup>9</sup>. Nitrocellulose membranes were incubated with the indicated primary antibody  
166 (Table 1) overnight at 4°C. After incubation, membranes were washed 3 times for 5 minutes with  
167 Tris-buffered saline supplemented with 0.1% Tween-20 (TBS-T). Membranes were then  
168 incubated with the indicated secondary antibody for 1 hr at room temperature. After incubation,  
169 membranes were washed 3 times for 5 minutes with TBS-T prior to incubation in ECL reagent for  
170 1 minute and imaging using a Chemidoc MP (BioRad). Images acquired were analyzed using  
171 Image Lab software (BioRad).

172

## 173 Generation of ClpP null cells using CRISPRi

174 To generate sgRNA for CRISPRi, primer pairs for each individual sgRNA were first annealed and  
175 later ligated to a digested VDB783 vector (50 ng/μL). Each ligation product was then transformed  
176 into DH5α by mixing 3 μL of DNA into 25 μL of competent cells. Cells/DNA mixture was incubated  
177 on ice for 30 minutes and heat shocked at 42°C for 45 seconds. Bacteria were centrifuged at  
178 maxspeed for 1 minute at room temperature. The resulting bacterial pellet was resuspended in  
179 30 μL of LB, spread on an LB-Amp plate and incubated at 37°C overnight. Colony PCR was  
180 performed to check for positive clones of each sgRNA. Single positive clones were grown in 5 mL  
181 of LB supplemented with Ampicillin at 37°C overnight. Cultures were miniprep the next day  
182 using a QIAprep Spin Miniprep Kit (Qiagen, U.S.A.) according to the manufacturer's protocol.  
183 Lentivirus were produced in HEK293T cells. Transfection and clonal isolation of the CRISPR null  
184 mammalian cells was done as previously described<sup>33</sup>.

185

## 186 RNA extraction and cDNA synthesis

187 Total RNA was extracted and purified using RNeasy Mini Kit (Qiagen, U.S.A.) according to the  
188 manufacturer's protocol. cDNA was synthesized from reverse transcription on 1.0 μg total RNA

189 in a 20  $\mu$ L reaction using High-Capacity cDNA Reverse Transcription Kit (Applied Biosystems,  
190 U.S.A.) and T100 thermal cycler (BIO-RAD, U.S.A.), according to the manufacturer's protocol.

191

#### 192 Quantitative real-time PCR (qRT-PCR)

193 The cDNA was analyzed by real-time qPCR using iTaq Universal SYBR Green Supermix (BIO-RAD)  
194 on an Applied Biosystems 7500 Fast Real-Time PCR System. For each reaction, 1  $\mu$ L of cDNA was  
195 mixed with 12.5  $\mu$ l of 2 x SYBR mix, 8  $\mu$ L of water, 1.75  $\mu$ l of Forward primer and 1.75  $\mu$ l of Reverse  
196 primer. Expression of GAPDH or  $\beta$ -Actin was used to normalize expression of genes of interest.  
197 Every biological replicate was analyzed in technical duplicate. Primer targets and sequence are  
198 listed in Table 3.

#### 199 Caspase Activity Assay

200 Caspase activity was analyzed using a fluorescent peptide substrate for caspase 3 (Ac-DEVD-AMC)  
201 or Caspase 8 (Ac-VETD-AMC). Cells were plated in a 6 well plate (100,000 cells/well) and treated  
202 with 0.1% DMSO, 150 nM TR-57, 100 nM staurosporine for 48hrs or 100ng/ml of TRAIL for 6hrs.  
203 The samples were harvested by mechanical scraping of the cells into 200  $\mu$ L of lysis buffer [50  
204 mM HEPES (pH 7.4), 5 mM CHAPS, and 5 mM DTT], lysates were clarified by centrifugation at  
205 10,000xg for 5 minutes at 4°C and protein concentrations were normalized using a Bradford  
206 Assay. 100  $\mu$ g of protein was added to 200  $\mu$ L of assay buffer [20 mM HEPES (pH 7.4), 0.1% CHAPS,  
207 2 mM EDTA, 5 mM DTT, and 15  $\mu$ M caspase substrate] in a 96 well plate. The plate was then  
208 incubated at room temperature in the dark for 1 hour. The fluorescence intensity from liberated  
209 AMC was measured using 360 nm excitation and 460 nm emission filters on a Biorad plate reader.  
210 The results were analyzed using GraphPad Prism 9 software.

#### 211 Statistical Analysis

212 Statistical calculations for all the data were performed using GraphPad Prism 9. Data are reported  
213 as the mean  $\pm$  standard error of the mean (S.E.M). S.E.M. was performed on all datasets to  
214 determine positive and negative error. Unpaired Two-tailed student t-test or One-way ANOVA  
215 was used to make comparisons between groups, and p values below 0.05 at the 95% confidence  
216 level were considered to be statistically significant.

217

218 **Table 1**

| Antibody                | Manufacturer              | Catalog number |
|-------------------------|---------------------------|----------------|
| β-Actin                 | Santa Cruz Biotechnology  | SC-47778       |
| Vinculin                | Santa Cruz Biotechnology  | SC-73614       |
| Total Rb                | Santa Cruz Biotechnology  | SC-50          |
| Phospho-Rb (Ser807/811) | Cell Signaling Technology | CS-8516        |
| TUFM                    | Invitrogen                | PA5-27511      |
| ClpP                    | Cell Signaling Technology | CS-14181       |
| Phospho-AMPK (Thr172)   | Cell Signaling Technology | CS-2535        |
| DR5                     | ProScience                | 2019           |
| Phospho-H2A.X (S139)    | Abclonal                  | AP0687         |
| Total H2A.X             | Abclonal                  | A11463         |
| Phos-CDK1 (Tyr15)       | Cell Signaling Technology | CS-2543        |
| Wee1                    | Cell Signaling Technology | CS-13084       |
| GDF15                   | Santa Cruz Biotechnology  | SC-377195      |
| IL-10                   | Cell Signaling Technology | CS-12163       |

219

220 **Table 2**

| Primers for ClpP sgRNA   | Sequence                 |
|--------------------------|--------------------------|
| Forward primer for CLPP1 | TTGGGTGGCCCGGAATATTGGTAG |
| Reverse primer for CLPP1 | AAACCTACCAATATTCCGGGCCAC |
| Forward primer for CLPP2 | TTGGGGGGATGTGGCCCGGAATAT |
| Reverse primer for CLPP2 | AAACATATTCCGGGCCACATCCCC |
| Forward primer for CLPP3 | TTGGGCAGCGGTGCCTGCACGCGA |
| Reverse primer for CLPP3 | AAACTCGCGTGCAGGCACCGCTGC |
| Forward primer for CLPP4 | TTGGGCGTGGTGGAGCAGACGGTA |

221

222 **Table 3**

| Primer target              | Sequence                  |
|----------------------------|---------------------------|
| Forward primer for B-actin | TCACCCCACTGTGCCCATCTACGA  |
| Reverse primer for B-actin | CAGCGGAACCGCTCATTGCCAATGG |
| Forward primer for GAPDH   | AGGGCTGCTTTAACTCTGGT      |
| Reverse primer for GAPDH   | CCCCACTTGATTTTGGAGGGA     |
| Forward primer for IL8     | ACTGAGAGTGATTGAGAGTGGAC   |
| Reverse primer for IL8     | AACCCTCTGCACCCAGTTTTC     |
| Forward primer for IL10    | GCGCTGCATCGATTTCTTCC      |
| Reverse primer for IL10    | ATTCTTCACCTGCTCCACGG      |
| Forward primer for IL12    | TCCAGAAGGCCAGACAAACTC     |
| Reverse primer for IL12    | TCCAATGGTAAACAGGCCTCC     |



|                                         |                      |
|-----------------------------------------|----------------------|
| Forward primer for TNFa                 | CCCATGTTGTAGCAAACCTC |
| Reverse primer for TNFa                 | TATCTCTCAGCTCCACGCCA |
| Forward primer for Beta-2 Microglobulin | GAGGCTATCCAGCGTGAGT  |
| Reverse primer for Beta-2 Microglobulin | CGGCAGGCATACTCATCTTT |

223

## 224 **Results**

225

### 226 **ClpP activators ONC201 and TR-57 induce senescence in TNBC cell lines**

227 Senescence is phenotypic cell state in which the cell has exited the cell cycle and ceases to  
228 proliferate. Increased levels of DNA damage, lack of proliferation, reduced Rb phosphorylation,  
229 and increased B-gal activity are all hallmarks of cellular senescence<sup>21,29,30,34,35</sup>. In our previous  
230 study, we demonstrated that treatment with ONC201 and the related TR compounds caused  
231 growth arrest of the TNBC cell line SUM159 without a reduction in total cell numbers<sup>9</sup>. Thus, we  
232 investigated whether these compounds were inducing senescence in these cells. SUM159 cells  
233 were treated with 10  $\mu$ M ONC201 or 150 nM TR-57 for 48 hrs then fixed and stained for  $\beta$ -gal  
234 activity using X-gal as described in Material and Methods. Imaging of these cells showed an  
235 increase in  $\beta$ -gal positive cells after treatment with ONC201, TR-57, or the CDK4/6 inhibitor  
236 known to induce cellular senescence abemaciclib (Fig. 1A)<sup>36-38</sup>. Manual counting of cells in each  
237 treatment group revealed that ONC201 and TR-57 increased the percentage of B-gal positive cells  
238 from ~1% in cells treated with vehicle alone to 41% and 37% respectively. The increase in B-gal  
239 positive cells observed in response to these compounds was similar to that found with  
240 abemaciclib, 45%, which served as a positive control for cellular senescence. (Fig. 1B).

241

242 We next used immunoblots for phosphorylation marks on H2A.X or Rb to determine whether  
243 treatment with ONC201 or TR-57 increased levels of DNA damage or progression through the cell  
244 cycle respectively. We observed an increase in H2A.X phosphorylation after ONC201 or TR-57  
245 treatment (Fig. 1C). While CDK4/6 inhibitors induce senescence, they do not increase DNA  
246 damage levels<sup>39</sup>. Accordingly, no changes in phosphorylation levels of H2A.X after treatment with  
247 abemaciclib were detected (Fig. 1C). ONC201, TR-57, and abemaciclib reduced Rb  
248 phosphorylation after 48 hrs (Fig. 1D). Similar results were observed in MDA-MB-231 cells,

249 another TNBC cell line (Supp Fig. 1A). Furthermore, treatment of SUM159 cells with another  
250 highly potent ClpP activator<sup>33</sup>, TR107, also caused a strong reduction in Rb phosphorylation (Supp  
251 Fig. 2A). As previously described<sup>9,33</sup>, ClpP activation with ONC201 or TR-57 resulted in the loss of  
252 the mitochondrial protein TUFM but, as expected, abemaciclib had no effect on TUFM protein  
253 levels (Fig. 1D). Together these data indicate that ClpP activators like ONC201 or TR-57 lead to an  
254 increase in established senescence markers in these cells.

255

### 256 **Induction of senescence by TR-57 is ClpP dependent**

257 Since ONC201 and TR-57 were equally effective at inducing senescence in both SUM159 and  
258 MDA-MB-231 cell lines, we chose to use SUM159 in subsequent experiments. To confirm that  
259 TR-57 was inducing senescence through a ClpP-dependent mechanism, we generated SUM159  
260 ClpP null cells using an established dCas9-KRAB system<sup>40,41</sup>. Knockdown of ClpP was verified by  
261 immunoblotting. Successful knockdown of ClpP was achieved in ClpP null cells as there was no  
262 detectable signal in immunoblots (Fig2A). Knockdown of ClpP did not affect the proliferation of  
263 these cells as the doubling time (~21 hours) was determined to be equivalent to the wild type  
264 cells. Consistent with the loss of ClpP in ClpP null cells, TUFM protein levels were not reduced  
265 upon treatment with TR-57. (Fig. 2A). When compared to wild-type cells, ClpP null cells were  
266 largely insensitive to TR-57 in MTS-based viability assays with a >100-fold shift in IC50 (Fig. 2B).

267

268 Next, we investigated whether TR-57 induced senescence in ClpP null cells by evaluating the  
269 parameters described above. While abemaciclib induced senescence in the SUM159 ClpP null  
270 cells, no induction of senescence was observed after incubation with TR-57 as shown by the lack  
271 of  $\beta$ -gal positive cells (Fig. 2C). Notably, percent of  $\beta$ -gal positive ClpP null cells after abemaciclib  
272 (54%) (Fig. 2D), was similar to that observed with wild type SUM159 cells (44%) (Fig. 1B).  
273 Moreover, TR-57 did not reduce Rb phosphorylation, whereas abemaciclib strongly reduced Rb  
274 phosphorylation in ClpP null cells (Fig. 2E). These data demonstrate that induction of senescence  
275 by TR-57 in TNBC cells is ClpP dependent and differs from mechanisms driving senescence upon  
276 treatment with abemaciclib.

277

278 **TR-57 increases immune markers associated with senescence**

279 IL-8 has been shown to regulate inflammatory responses and plays an important role as a  
280 leukocyte activator when secreted by senescent cells<sup>25,26</sup>. Thus, IL-8 is considered a key  
281 component of SASP. Induction of MiDAS has been reported to increase the levels of anti-  
282 inflammatory and pro-inflammatory cytokines IL-10 and TNF $\alpha$ , respectively<sup>27,42</sup>. To test whether  
283 any of these senescence associated cytokines were upregulated upon treatment with TR-57,  
284 SUM159 cells were treated with TR-57 as described above and IL-8, IL-10, IL-12, and TNF $\alpha$  mRNA  
285 levels were measured by qRT-PCR as described in Material and Methods. TR-57 induced a 3-fold  
286 increase in IL-8, a 7-fold increase in IL-12, and a 28-fold increase in IL-10 (Fig. 3A). Additionally,  
287 TR-57 caused a 2-fold decrease in TNF $\alpha$  mRNA.

288  
289 To confirm that changes in cytokine expression were ClpP dependent, the experiment was  
290 repeated in ClpP null cells. TR-57 had no effect on IL-8 or IL-10 mRNA levels in the ClpP null cells  
291 (Fig. 3B). A 2-fold increase in IL-12 mRNA expression was observed in the ClpP null cell after TR-  
292 57 treatment when compared to the DMSO control, suggesting that ClpP loss only partially  
293 suppressed IL-12 upregulation. Also, TR-57 treatment led to a ~2-fold decrease in TNF $\alpha$  mRNA.  
294 These experiments suggested that changes by TR-57 in TNF $\alpha$  and IL-12 mRNA were not  
295 completely ClpP dependent while the increase in IL-8 and IL-10 mRNA was ClpP dependent. These  
296 ClpP dependent events are consistent with the development of senescence as determined by  $\beta$ -  
297 gal and other cellular markers (Fig. 2C & 2E). In order to validate our qRT-PCR data, we measured  
298 the amount of IL-10 protein in SUM159 cells and in tissue culture supernatant by immunoblot.  
299 While no significant levels of IL-10 were detected in cell lysates an increase in IL-10 protein was  
300 detected in the media of cells that were treated for 48 hrs with ONC201, TR-57, or abemaciclib,  
301 when compared to DMSO (Fig. 3C). These results demonstrate that TR-57 is inducing a SASP  
302 response in SUM159.

303  
304 AMPK activation is an established marker of MiDAS<sup>27</sup> in addition to upregulation of IL-10 shown  
305 above. We next evaluated if TR-57 treatment increased AMPK phosphorylation in SUM159 cells.  
306 As determined by immunoblotting for phospho-AMPK, TR-57 increased phospho-AMPK levels

307 after 48 hrs (Supp Fig. 3A). We also evaluated the mRNA levels of Beta-2-microglobulin (B2M)  
308 after TR-57 treatment, as senescent cells have been shown to trigger anti-tumor immunity  
309 through upregulation of B2M and other class I major histocompatibility complex members<sup>37</sup>.  
310 Quantification of B2M mRNA levels demonstrated that TR-57 induced a ~6-fold increase when  
311 compared to the DMSO control (Fig. 3D). Lastly, since growth differentiation factor 15 (GDF15) is  
312 a marker associated with aging and senescence in multiple cell models<sup>43</sup>, we evaluated the effects  
313 of ClpP agonists on GDF15 protein levels. As determined by immunoblotting, both ONC201 and  
314 TR-57 increased GDF15 levels at 24 and 48 hrs (Supp Fig. 3B/C). Altogether, our data suggest that  
315 TR-57 is inducing events associated with MiDAS in SUM159 cells.

316

### 317 **TR-57 alters the expression of antiapoptotic/proapoptotic proteins**

318 Previous reports have shown that senescent cells alter pro-survival responses through decreased  
319 expression of pro apoptotic proteins<sup>44,45</sup>. Therefore, we examined if induction of senescence by  
320 TR-57 affected the levels of apoptosis-related proteins in SUM159 cells using a human apoptosis  
321 array kit (R&D Systems, Inc., USA). Treatment with TR-57 led to a decrease in XIAP, Survivin, and  
322 SMAC/DIABLO (Fig. 4A). Interestingly, TRAIL receptor 1 (DR4), and TRAIL receptor 2 (DR5) were  
323 also downregulated when compared to the DMSO treated sample (Fig. 4B). The reduction in DR5  
324 was further validated by immunoblotting. As shown in figure 4C, treatment with TR-57 or  
325 abemaciclib led to a significant decrease of DR5 protein levels. Next, we tested whether TR-57  
326 treatment had an effect on DR5 mRNA levels using qRT-PCR. Quantification of DR5 mRNA levels  
327 demonstrated that TR-57 induced a ~1.5-fold decrease compared to the DMSO control (Figure  
328 4D). These findings suggest that TR-57 suppresses expression of proapoptotic protein levels and  
329 reduces gene expression of DR5.

330

### 331 **Induction of senescence sensitizes TNBC cells to TRAIL induced apoptosis**

332 Downregulation of proapoptotic proteins like SMAC/DIABLO or DR5 suggested that cells exposed  
333 to ClpP activators may be more resistant to apoptosis induction. Addition of TR-57 alone did not  
334 increase caspase-3 activity, whereas treatment with staurosporine (STS) or TRAIL led to a ~6-fold  
335 and ~5-fold increase in caspase-3 activity, respectively (Fig. 5A). Notably, treatment with TR-57

336 followed by STS prevented the increase in caspase-3 activity previously observed with STS alone.  
337 (Supp Fig. 4A)

338  
339 Since ONC201 was previously reported to induce TRAIL expression and caspase-dependent  
340 apoptotic cell death through DR5 activation<sup>37-39</sup>, we next compared the effects of TRAIL addition  
341 after TR-57 exposure. Interestingly, treatment with TR-57 followed by TRAIL led to a ~26-fold  
342 increase in caspase-3 activity, when compared to TR-57 alone (Fig. 5A). Similar results were  
343 obtained using a caspase-8 assay (Fig. 5B). Consistent with drastically increased caspase activity,  
344 cell death was confirmed by measuring total cell number after TRAIL treatment alone or in  
345 combination with TR-57 (Fig. 5C). Treatment with TRAIL alone was sufficient to inhibit cell  
346 proliferation by about 50% whereas no proliferation was observed after 72 hours of TR-57. By  
347 contrast, the combination of TR-57 followed by TRAIL resulted in a reduction of cell number from  
348 4000 on day 0 to only 582 following 72 hours of treatment suggesting cell death and consistent  
349 with enhanced caspase activity. Similar results were observed in another TNBC cell line, MDA-  
350 MB-231(Supp Fig. 5A).

351  
352 Lastly, we compared whether the increased sensitivity to TRAIL-induced apoptosis was affected  
353 by an alternative senescence inducer. While treatment with abemaciclib alone did not increase  
354 caspase-3 activity, the combinatorial treatment of abemaciclib followed by TRAIL resulted in an  
355 ~ 1.5-fold increase in caspase-3 activity (Fig. 5D). In summary, these results confirmed that  
356 senescence induction by TR-57 or abemaciclib leads to an increase in sensitivity of TNBC cells to  
357 TRAIL induced apoptosis.

358  
359 **Downregulation of Wee1 partially mediates TNBC cells sensitization to TRAIL induced**  
360 **apoptosis**

361 Previous studies have shown that loss or inhibition of Wee1 leads to TRAIL sensitization in breast  
362 cancer cells<sup>48,49</sup>. Therefore, to expand upon our recent results, we evaluated the effects of TR-57  
363 on Wee1 protein levels. Treatment with TR-57 or abemaciclib reduced total Wee1 protein levels  
364 in a ClpP dependent manner (Fig. 6A). We next tested whether adavosertib, a Wee1 inhibitor,

365 also resulted in an increase in TRAIL sensitivity. While treatment with adavosertib alone did not  
366 increase caspase-3 activity, combinatorial treatment of adavosertib followed by TRAIL  
367 incubation, led to a ~2-fold increase in caspase-3 activity when compared to DMSO and a ~0.7-  
368 fold increase when compared to TRAIL alone (Fig. 6B). Successful inhibition of Wee1 after  
369 adavosertib treatment was verified by the decrease of CDK1 phosphorylation, an established  
370 Wee1 substrate (Supp Fig. 6A). These data suggest that reduction of Wee1 in response to  
371 senescence induction may contribute to the enhanced effects of TRAIL in these cells.

372

### 373 **Discussion**

374 The discovery of ONC201 and related analogs has stimulated considerable interest in small  
375 molecule ClpP activators as novel anti-cancer agents. While the effects of ONC201 were initially  
376 attributed to effects on TRAIL and later dopamine receptors<sup>5,12,46,47</sup>, inconsistencies in the  
377 literature argued against these as common mechanisms of action. Importantly, differential  
378 effects on apoptosis, kinase signaling, TRAIL induction and dopamine receptor signaling were  
379 observed across multiple cancer models further suggesting cell type dependent responses. In  
380 contrast to other cancer models, TNBC cells showed little or no apoptosis in response to ONC201  
381 and related analogs<sup>9,13</sup>. In fact, these studies suggested a cytostatic response that was not  
382 dependent on TRAIL induction or expression of TRAIL receptors<sup>13</sup>. The results of our studies not  
383 only confirm that activation of ClpP has a cytostatic effect on cell growth but demonstrate a  
384 corresponding increase in senescence markers in TNBC cells.

385

386 In this report we also compared and contrasted the effects of abemaciclib, an established inducer  
387 of senescence in breast cancer models<sup>37</sup>. abemaciclib and other CDK4/6 inhibitors have been  
388 shown to effectively increase senescence in other TNBC models. Our studies demonstrate that  
389 TR-57, a highly potent and selective activator of the mitochondrial protease ClpP, induced  
390 established markers of senescence including increases in DNA damage and similar SASP profiles.  
391 Induction of senescence by TR-57 was equivalent to that observed with CDK4/6 inhibition but  
392 was completely dependent on ClpP whereas abemaciclib was not dependent on ClpP. This  
393 contrasted with the effects of the chemotherapeutic doxorubicin, which induced senescence in

394 a manner partially dependent on ClpP (data not shown). In addition to evoking SASP, TR-57 led  
395 to an increase in gene expression of immune marker B2M. This data is consistent with findings  
396 that ClpP activators can promote immune recruitment *in vivo*<sup>50</sup>.

397  
398 Increased sensitivity to TRAIL may be of pivotal importance to the effects of ClpP activators on  
399 the balance between senescence and apoptosis. Recent studies have shown that treatment with  
400 ClpP activators sensitizes endometrial, pancreatic ductal adenocarcinoma and other cancer cells  
401 to TRAIL induced apoptosis<sup>51-53</sup>. Our study shows that increased TRAIL sensitivity after ClpP  
402 activators is also observed in TNBC cells. However, most of the recent studies attributed such  
403 change in sensitivity to an increase in DR5 receptors. In this regard our study differs in that we  
404 observed reduced DR5 protein and mRNA levels in response to TR-57 treatment while increasing  
405 TRAIL mediated apoptotic response. Therefore, our findings argue that upregulation of DR5 is  
406 not necessary in TNBC models and that there is a potent TRAIL response even at reduced levels  
407 of DR5 expression induced by TR-57 treatment. Lastly, our study demonstrates that senescent  
408 TNBC cells had lower levels of Wee1, that correlated with an increase in senescence. While  
409 treatment with the Wee1 inhibitor adavosertib led to an increase in TRAIL sensitivity, the changes  
410 observed were modest when compared to the increase observed after TR-57. Thus, our data  
411 suggest that Wee1 inhibition may be partially responsible for the shift in TRAIL sensitivity but that  
412 additional mechanisms may contribute to the potent modulation of TRAIL sensitivity by ClpP  
413 activators.

414  
415 In conclusion, our study shows that ClpP activators induce senescence in TNBC cell lines in a ClpP  
416 dependent manner. Our findings also highlight that combining ClpP activators like TR-57 to  
417 induce senescence followed with TRAIL treatment provides an effective approach to arrest TNBC  
418 cells growth and eliminate malignant senescent cells *in vitro*.

419

#### 420 **Authors disclosure**

421 EJI has a financial interest in Madera Therapeutics.

422

423 **Acknowledgements**

424 This project is supported by grants from National Institutes of Health to LMG (5R01GM138520-  
425 02). This research was supported in part by the Intramural Research Program of the National  
426 Cancer Institute, Center of Cancer Research (ZIA SC 007263 to SL).

427

428 **References**

- 429 1. Yin, L., Duan, J.-J., Bian, X.-W. & Yu, S. Triple-negative breast cancer molecular subtyping  
430 and treatment progress. *Breast Cancer Res.* **22**, 61 (2020).
- 431 2. Bergin, A. R. T. & Loi, S. Triple-negative breast cancer: Recent treatment advances  
432 [version 1; peer review: 2 approved]. *F1000Research* **8**, 1–11 (2019).
- 433 3. Costa, R. L. B. & Gradishar, W. J. Triple-negative breast cancer: Current practice and  
434 future directions. *J. Oncol. Pract.* **13**, 301–303 (2017).
- 435 4. Stein, M. N. *et al.* First-in-human clinical trial of oral ONC201 in patients with refractory  
436 solid tumors. *Clin. Cancer Res.* **23**, 4163–4169 (2017).
- 437 5. Arrillaga-Romany, I. *et al.* A phase 2 study of the first imipridone ONC201, a selective  
438 DRD2 antagonist for oncology, administered every three weeks in recurrent  
439 glioblastoma. *Oncotarget* **8**, 79298–79304 (2017).
- 440 6. Wagner, J. *et al.* Preclinical evaluation of the imipridone family, analogs of clinical stage  
441 anti-cancer small molecule ONC201, reveals potent anti-cancer effects of ONC212. *Cell*  
442 *Cycle* **16**, 1790–1799 (2017).
- 443 7. Nii, T. *et al.* Imipridone ONC212 activates orphan G protein-coupled receptor GPR132  
444 and integrated stress response in acute myeloid leukemia. *Leukemia* **33**, 2805–2816  
445 (2019).
- 446 8. Ferrarini, I., Louie, A., Zhou, L. & El-Deiry, W. S. ONC212 is a Novel Mitocan Acting  
447 Synergistically with Glycolysis Inhibition in Pancreatic Cancer. *Mol. Cancer Ther.* **20**,  
448 1572–1583 (2021).
- 449 9. Graves, P. R. *et al.* Mitochondrial Protease ClpP is a Target for the Anticancer Compounds  
450 ONC201 and Related Analogues. *ACS Chem. Biol.* (2019).  
451 doi:10.1021/acscchembio.9b00222



- 452 10. Huang, J. *et al.* Discovery of a Novel Series of Imipridone Compounds as Homo sapiens  
453 Caseinolytic Protease P Agonists with Potent Antitumor Activities In Vitro and In Vivo. *J.*  
454 *Med. Chem.* **65**, 7629–7655 (2022).
- 455 11. Bonner, E. R., Waszak, S. M., Grotzer, M. A., Mueller, S. & Nazarian, J. Mechanisms of  
456 imipridones in targeting mitochondrial metabolism in cancer cells. *Neuro. Oncol.* **23**,  
457 542–556 (2021).
- 458 12. Allen, J. E. *et al.* Dual inactivation of Akt and ERK by TIC10 signals Foxo3a nuclear  
459 translocation, TRAIL gene induction, and potent antitumor effects. *Sci. Transl. Med.* **5**,  
460 171ra17 (2013).
- 461 13. Greer, Y. E. *et al.* ONC201 kills breast cancer cells in vitro by targeting mitochondria.  
462 *Oncotarget* **9**, 18454–18479 (2018).
- 463 14. Ishizawa, J. *et al.* Mitochondrial ClpP-Mediated Proteolysis Induces Selective Cancer Cell  
464 Lethality. *Cancer Cell* **35**, 721-737.e9 (2019).
- 465 15. Kline, C. L. B. *et al.* ONC201 kills solid tumor cells by triggering an integrated stress  
466 response dependent on ATF4 activation by specific eIF2 $\alpha$  kinases. *Sci. Signal.* **9**, ra18  
467 (2016).
- 468 16. Nouri, K., Feng, Y. & Schimmer, A. D. Mitochondrial ClpP serine protease-biological  
469 function and emerging target for cancer therapy. *Cell Death Dis.* **11**, (2020).
- 470 17. Bhandari, V. *et al.* The Role of ClpP Protease in Bacterial Pathogenesis and Human  
471 Diseases. *ACS Chem. Biol.* **13**, 1413–1425 (2018).
- 472 18. Mabanglo, M. F. & Houry, W. A. Recent structural insights into the mechanism of ClpP  
473 protease regulation by AAA+ chaperones and small molecules. *J. Biol. Chem.* **298**,  
474 101781 (2022).
- 475 19. Ishizawa, J. *et al.* ATF4 induction through an atypical integrated stress response to  
476 ONC201 triggers p53-independent apoptosis in hematological malignancies. *Sci. Signal.*  
477 **9**, ra17 (2016).
- 478 20. Hayflick, L. The limited in vitro lifetime of human diploid cell strains. *Exp. Cell Res.* **37**,  
479 614–636 (1965).
- 480 21. Muñoz-Espín, D. & Serrano, M. Cellular senescence: From physiology to pathology. *Nat.*

- 481 *Rev. Mol. Cell Biol.* **15**, 482–496 (2014).
- 482 22. Soto-Gamez, A., Quax, W. J. & Demaria, M. Regulation of Survival Networks in Senescent  
483 Cells: From Mechanisms to Interventions. *J. Mol. Biol.* **431**, 2629–2643 (2019).
- 484 23. Zhu, Y., Armstrong, J. L., Tchkonja, T. & Kirkland, J. L. Cellular senescence and the  
485 senescent secretory phenotype in age-related chronic diseases. *Curr. Opin. Clin. Nutr.*  
486 *Metab. Care* **17**, 324–328 (2014).
- 487 24. Kumari, R. & Jat, P. Mechanisms of Cellular Senescence: Cell Cycle Arrest and Senescence  
488 Associated Secretory Phenotype. *Front. Cell Dev. Biol.* **9**, 1–24 (2021).
- 489 25. Coppé, J.-P., Desprez, P.-Y., Krtolica, A. & Campisi, J. Annu Rev Pathol\_NIH Public Access.  
490 *Annu Rev Pathol* **8**, 99–118 (2010).
- 491 26. Ortiz-Montero, P., Londoño-Vallejo, A. & Vernet, J. P. Senescence-associated IL-6 and IL-8  
492 cytokines induce a self- and cross-reinforced senescence/inflammatory milieu  
493 strengthening tumorigenic capabilities in the MCF-7 breast cancer cell line. *Cell Commun.*  
494 *Signal.* **15**, 1–18 (2017).
- 495 27. Wiley, C. D. *et al.* Mitochondrial dysfunction induces senescence with a distinct secretory  
496 phenotype. *Cell Metab.* **23**, 303–314 (2016).
- 497 28. Gallage, S. & Gil, J. Mitochondrial Dysfunction Meets Senescence. *Trends Biochem. Sci.*  
498 **41**, 207–209 (2016).
- 499 29. Ewald, J. A., Desotelle, J. A., Wilding, G. & Jarrard, D. F. Therapy-induced senescence in  
500 cancer. *J. Natl. Cancer Inst.* **102**, 1536–1546 (2010).
- 501 30. Wang, L., Lankhorst, L. & Bernards, R. Exploiting senescence for the treatment of cancer.  
502 *Nat. Rev. Cancer* **22**, 340–355 (2022).
- 503 31. Galiana, I. *et al.* Preclinical antitumor efficacy of senescence-inducing chemotherapy  
504 combined with a nanoSenolytic. *J. Control. Release* **323**, 624–634 (2020).
- 505 32. Gonzalez-Meljem, J. M., Apps, J. R., Fraser, H. C. & Martinez-Barbera, J. P. Paracrine roles  
506 of cellular senescence in promoting tumourigenesis. *Br. J. Cancer* **118**, 1283–1288 (2018).
- 507 33. Fennell, E. M. J. *et al.* Characterization of TR-107, a Novel Chemical Activator of the  
508 Human Mitochondrial Protease ClpP. *bioRxiv* (2022). doi:10.1101/2022.02.14.480426
- 509 34. Fridman, A. L. & Tainsky, M. A. Critical pathways in cellular senescence and

- 510 immortalization revealed by gene expression profiling. *Oncogene* **27**, 5975–5987 (2008).
- 511 35. Jochems, F. *et al.* The Cancer SENESCopedia: A delineation of cancer cell senescence. *Cell*  
512 *Rep.* **36**, (2021).
- 513 36. Hwang, H. J. *et al.* Endothelial cells under therapy-induced senescence secrete CXCL11,  
514 which increases aggressiveness of breast cancer cells. *Cancer Lett.* **490**, 100–110 (2020).
- 515 37. Goel. CDK4/6 inhibition triggers anti-tumor immunity Shom. **12**, 152–163 (2015).
- 516 38. Zhong, G. *et al.* Oxidative stress induces senescence in breast cancer stem cells. *Biochem.*  
517 *Biophys. Res. Commun.* **514**, 1204–1209 (2019).
- 518 39. Salvador-Barbero, B. *et al.* CDK4/6 Inhibitors Impair Recovery from Cytotoxic  
519 Chemotherapy in Pancreatic Adenocarcinoma. *Cancer Cell* **37**, 340-353.e6 (2020).
- 520 40. Horlbeck, M. A. *et al.* Compact and highly active next-generation libraries for CRISPR-  
521 mediated gene repression and activation. *Elife* **5**, e19760 (2016).
- 522 41. Gilbert, L. A. *et al.* Genome-Scale CRISPR-Mediated Control of Gene Repression and  
523 Activation. *Cell* **159**, 647–661 (2014).
- 524 42. S, Gautamethi, Bokyung Sung, B. B. A. [Frontiers in Bioscience 5094-5107, May 1, 2008]  
525 TNF: A master switch for inflammation to cancer Gautam Sethi, Bokyung Sung, Bharat B.  
526 Aggarwal. *Front. Biosci.* 5094–5107 (2008).
- 527 43. Al-Mudares, F. *et al.* Role of Growth Differentiation Factor 15 in Lung Disease and  
528 Senescence: Potential Role Across the Lifespan. *Front. Med.* **7**, 1–8 (2020).
- 529 44. Zhu, Y. *et al.* The achilles' heel of senescent cells: From transcriptome to senolytic drugs.  
530 *Aging Cell* **14**, 644–658 (2015).
- 531 45. Chambers, C. R., Ritchie, S., Pereira, B. A. & Timpson, P. Overcoming the senescence-  
532 associated secretory phenotype (SASP): a complex mechanism of resistance in the  
533 treatment of cancer. *Mol. Oncol.* **15**, 3242–3255 (2021).
- 534 46. Feng, Y., Zhou, J., Li, Z., Jiang, Y. & Zhou, Y. Small molecular TRAIL inducer ONC201  
535 induces death in lung cancer cells: A preclinical study. *PLoS One* **11**, 1–13 (2016).
- 536 47. Allen, J. E. *et al.* Discovery and clinical introduction of first-in-class imipridone ONC201.  
537 *Oncotarget* **7**, (2016).
- 538 48. Murrow, L. M., Garimella, S. V, Jones, T. L., Caplen, N. J. & Lipkowitz, S. Identification of

- 539 WEE1 as a potential molecular target in cancer cells by RNAi screening of the human  
540 tyrosine kinome. *Breast Cancer Res. Treat.* **122**, 347–357 (2010).
- 541 49. Garimella, S. V, Rocca, A. & Lipkowitz, S. WEE1 inhibition sensitizes basal breast cancer  
542 cells to TRAIL-induced apoptosis. *Mol. Cancer Res.* **10**, 75–85 (2012).
- 543 50. Wagner, J. *et al.* Dose intensification of TRAIL-inducing ONC201 inhibits metastasis and  
544 promotes intratumoral NK cell recruitment. *J. Clin. Invest.* **128**, 2325–2338 (2018).
- 545 51. Ray, J. E. *et al.* Antitumorigenic effect of combination treatment with ONC201 and TRAIL  
546 in endometrial cancer in vitro and in vivo. *Cancer Biol. Ther.* **22**, 554–563 (2021).
- 547 52. Jhaveri, A. V. *et al.* Combination of ONC201 and TLY012 induces selective, synergistic  
548 apoptosis in vitro and significantly delays PDAC xenograft growth in vivo. *Cancer Biol.*  
549 *Ther.* **22**, 607–618 (2021).
- 550 53. Ralff, M. D. *et al.* TRAIL receptor agonists convert the response of breast cancer cells to  
551 ONC201 from anti-proliferative to apoptotic. *Oncotarget* **11**, 3753–3769 (2020).
- 552
- 553

554 **Figure and figure legends**

555

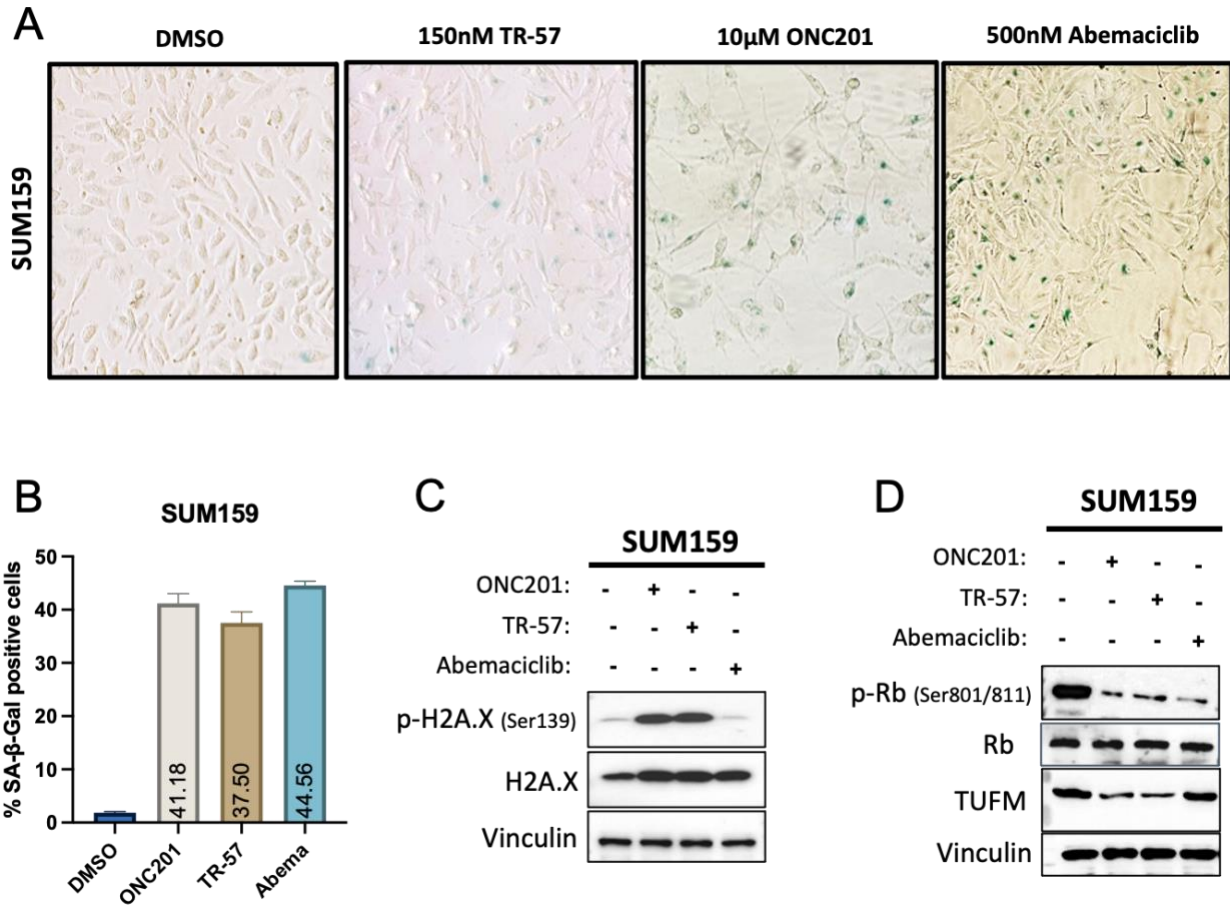

556

557 **Fig. 1 Activation of ClpP induces senescence in TNBC cells**

558 **A.** β-Galactosidase Staining of SUM159 cells 4 days after being treated with ONC201, TR-57, or  
 559 abemaciclib for 48hrs. **B.** Quantification of images shown in Fig1B. **C.** Immunoblots showing the  
 560 effect of ONC201, TR-57, and abemaciclib (48hr treatment) on DNA damage marker phospho-  
 561 H2A.X in SUM159 WT cells. **D.** Immunoblots showing the effect of ONC201, TR-57, and  
 562 abemaciclib (48hr treatment) on the phosphorylation levels of cell cycle regulator protein Rb in  
 563 SUM159 WT cells. Data shown in this figure is representative of 3 independent experiments.

564

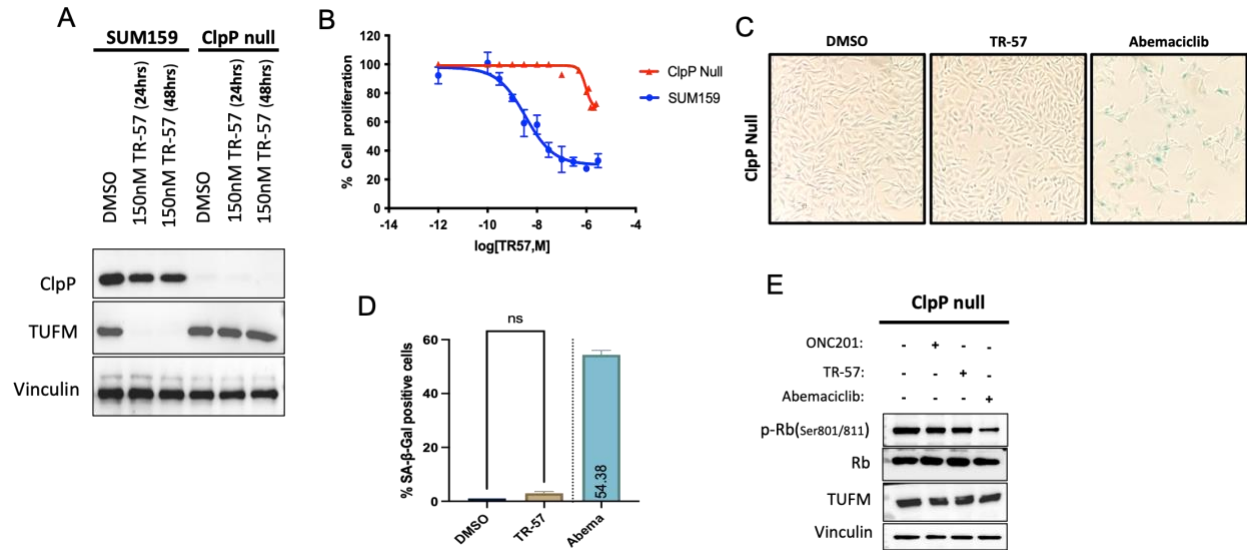

565

566 **Fig. 2 Induction of senescence by TR-57 is ClpP dependent**

567 **A.** Validation of SUM159 ClpP null cell line generated using CRISPRi. Total levels of ClpP protein  
 568 were assessed in SUM159 WT and ClpP null cells using immunoblots. **B.** Cell viability plots for  
 569 SUM159 WT and ClpP null cells using MTS assay after 48 hrs treatment with TR-57 (150 nM) **C.**  
 570 Senescence β-Galactosidase Staining of SUM159 ClpP null cells 4 days after being treated with  
 571 TR-57 (150 nM) or abemaciclib (500 nM) for 48 hrs. **D.** Quantification of images shown in Fig.  
 572 2C. **E.** Immunoblots showing the effect of ONC201 (10 μM), TR-57 (150 nM), and abemaciclib  
 573 (500 nM) 48 hrs treatments on the phosphorylation levels of cell cycle regulator protein Rb in  
 574 SUM159 ClpP null cells. Data shown in this figure is representative of 3 independent  
 575 experiments.

576

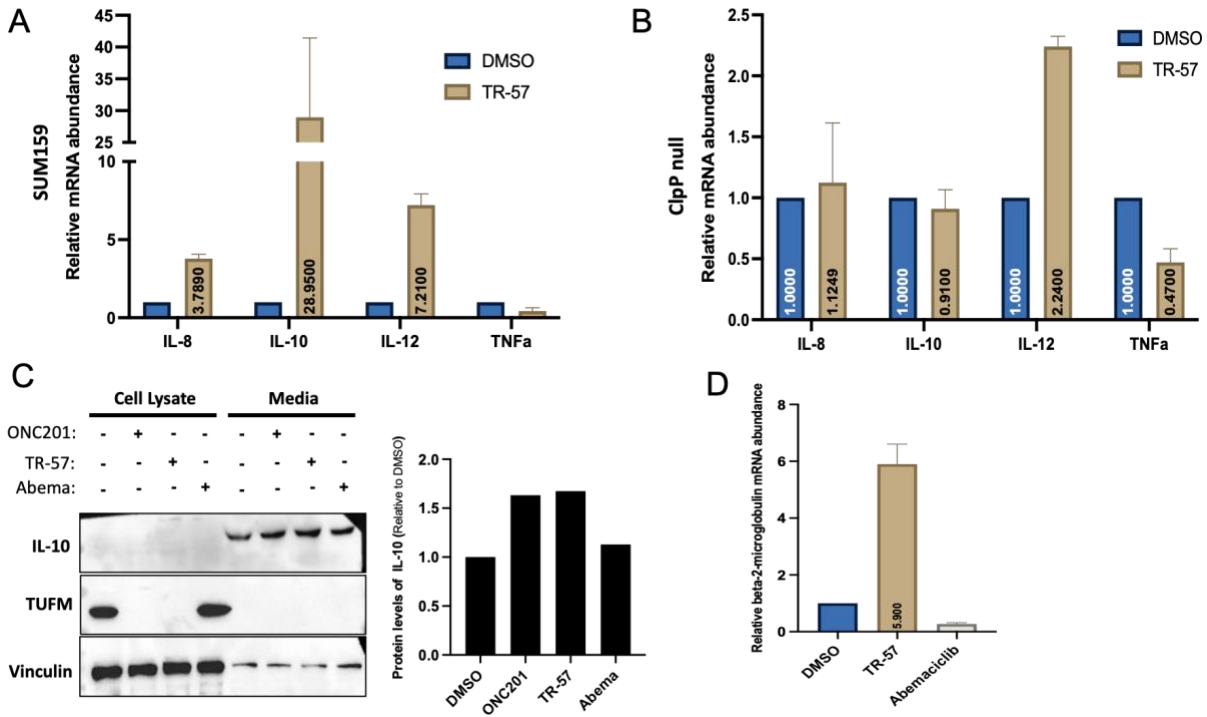

577

578 **Fig. 3 ClpP activation increases immune markers associated with senescence**

579 **A.** Gene expression of immune markers IL-8, IL-10, IL-12 and TNFa in SUM159 WT cells after  
 580 being treated with TR-57 (150 nM) for 48 hrs. **B.** Gene expression of immune markers IL-8, IL-10,  
 581 IL-12 and TNFa in SUM159 ClpP null cells after being treated with TR-57 (150 nM) for 48 hrs. **C.**  
 582 Immunoblots showing the effect of ONC201 (10  $\mu$ M), TR-57 (150 nM), and abemaciclib (500  
 583 nM) 48 hr treatments on IL-10 protein levels in SUM159 WT cells **D.** Gene expression of immune  
 584 marker B2M in SUM159 WT cells after being treated with TR-57 (150 nM) or abemaciclib (500  
 585 nM) for 48 hrs.

586

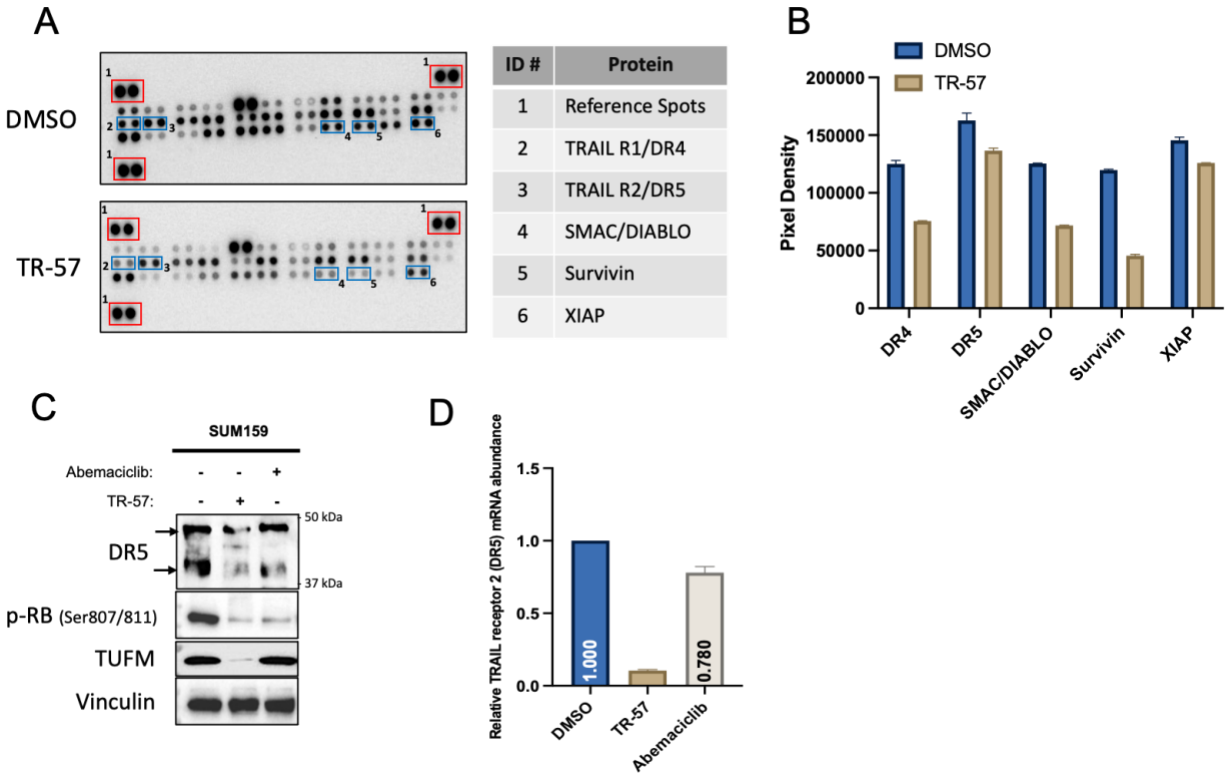

587

588 **Fig. 4 Induction of senescence leads to downregulation of apoptotic proteins**

589 **A.** Detection of apoptosis related proteins levels in SUM159 cells after TR-57 (150 nM)  
 590 treatment for 48 hrs using a human apoptosis array **B.** Quantification of DR4/5 array blot  
 591 data shown in Fig. 4A **C.** Immunoblots showing the effect of TR-57 (150 nM) or  
 592 abemaciclib (500 nM) treatments for 48 hrs on DR5 protein levels in SUM159 WT cells.  
 593 **D.** Gene expression of DR5 in SUM159 WT cells after 48 hrs treatment of TR-57 (150 nM)  
 594 or abemaciclib (500 nM).  
 595



596  
597  
598

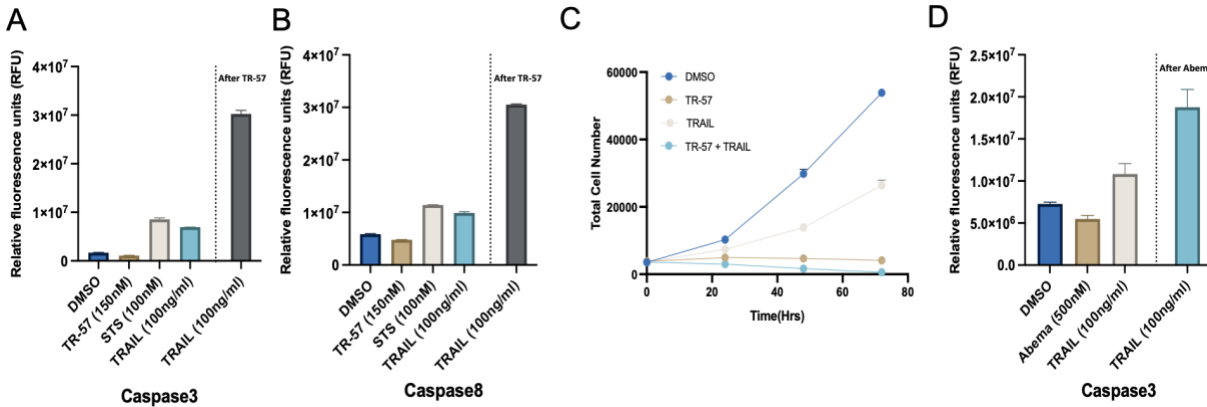

599

600 **Fig. 5 Senescent cells show increased sensitivity to TRAIL-induced apoptosis**

601 **A.** Measurement of caspase 3 activity in SUM159. Cells were treated with TR-57 (150 nM) for 48  
602 hrs, STS (100 nM) for 24 hrs, TRAIL (100 ng/ml) for 6 hrs, or TR-57 (150 nM) for 48 hrs in  
603 combination with TRAIL (100ng/ml) for 6 hrs **B.** Measurement of caspase 8 activity in SUM159.  
604 Cells were treated as described in Fig. 5A **C.** Total cell count assay of SUM159 cells. Cells were  
605 treated with TR-57 (150 nM) for 48 hrs, TRAIL (100 ng/ml) for 6 hrs, or TR-57 (150 nM) for 48  
606 hrs in combination with TRAIL (100ng/ml) for 6 hrs and imaged following Hoechst stain addition  
607 after 72 hours. **D.** Measurement of caspase 3 activity in SUM159 after treatment with  
608 abemaciclib alone or in combination with TRAIL. Caspase activity for Fig. 5 A, B, and C was  
609 measured using a fluorescent peptide substrate assay as described in methods. Data shown in  
610 this figure is representative of 3 independent experiments.

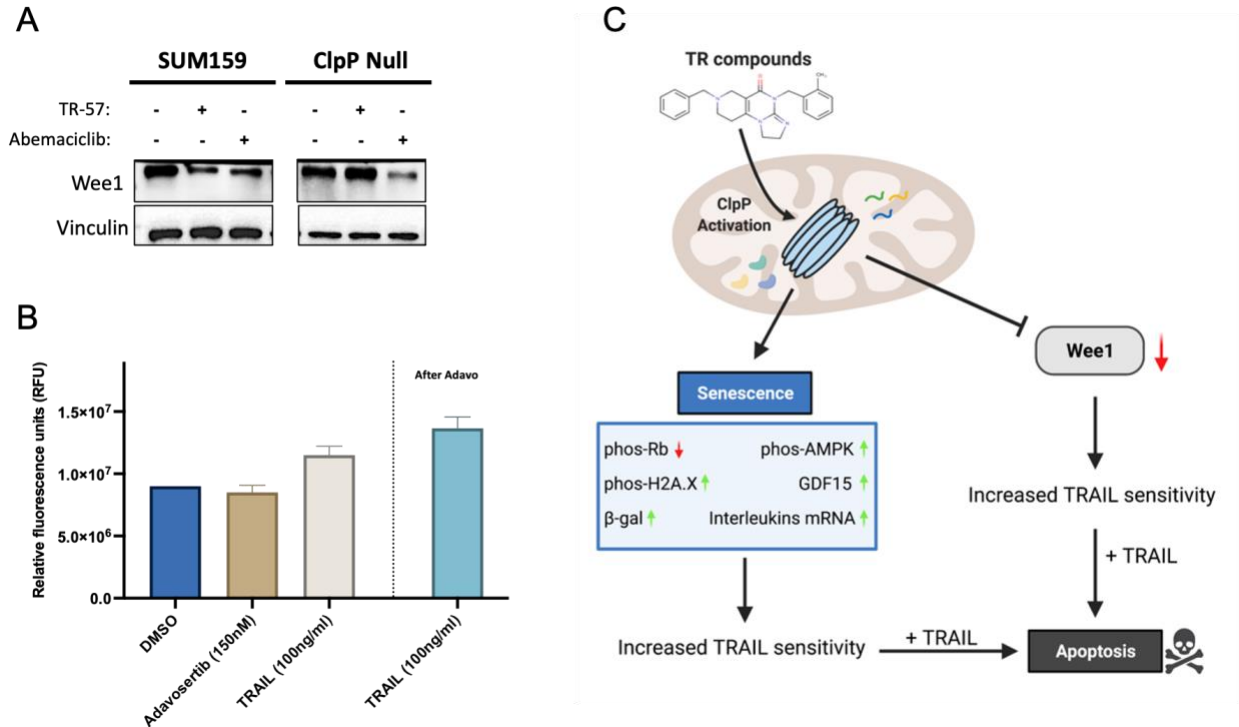

611

612

613 **Fig. 6 Downregulation of Wee1 partially mediates TNBC cells sensitization to TRAIL-induced**  
 614 **apoptosis**

615 **A.** Immunoblots showing the effect of TR-57 (150 nM) or abemaciclib (500 nM) treatments for  
 616 48 hrs on Wee1 levels in SUM159 WT and SUM159 ClpP null cells. **B.** Measurement of caspase 3  
 617 activity in SUM159. Cells were treated with Adavosertib for 24 hrs, STS (100 nM) for 24 hrs,  
 618 TRAIL (100 ng/ml) for 6 hrs, or Adavosertib for 48 hrs in combination with TRAIL (100 ng/ml) for  
 619 6 hrs. **C.** Proposed model on how ClpP agonists lead to senescence and TRAIL sensitivity. Data  
 620 shown in this figure is representative of 3 independent experiments.

621

622
